# Supplementary material
Source: PubMed Central journal article supplement (PMC4550569)

# Supplemental Figure 1

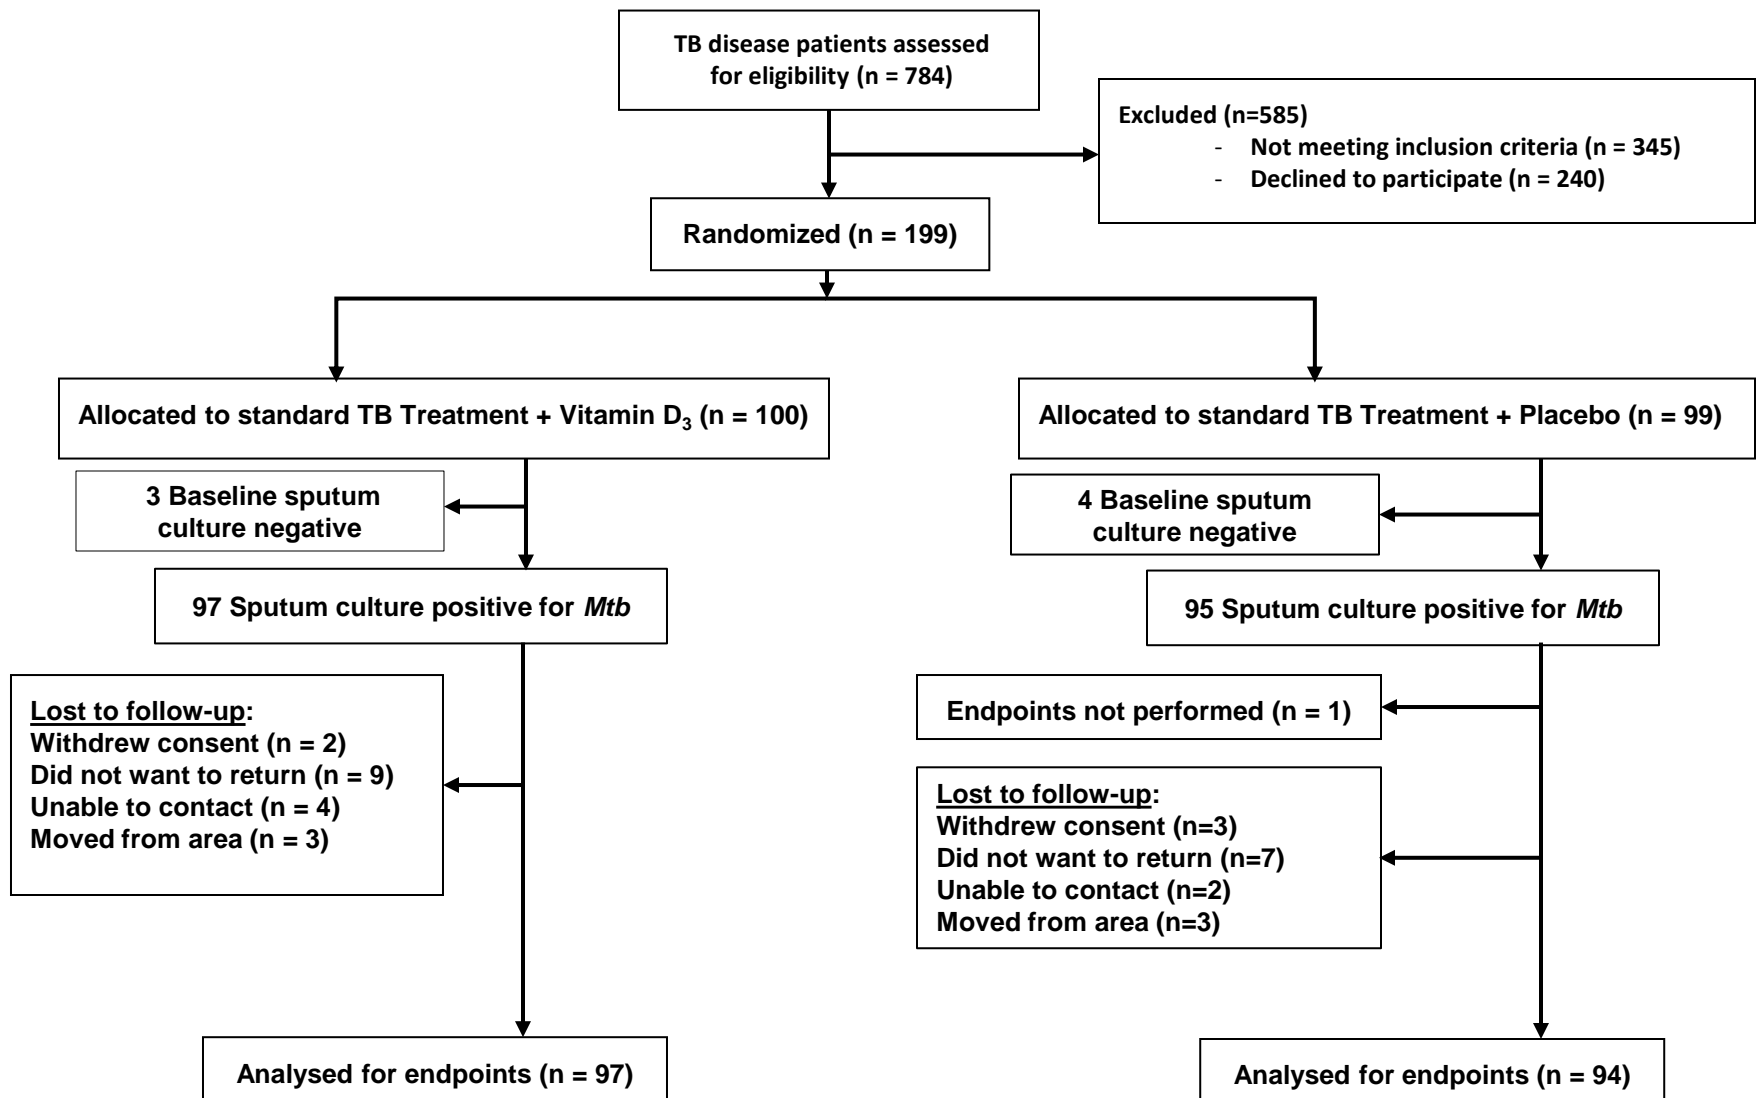

Supplement: NIHMS667678-supplement-2.pdf [file NIHMS667678-supplement-2.pdf]
